# Supplementary material for: A Novel Technique for the Generation of Substantial Numbers of Functional Resident T Cells from Kidney Tissue
Source: MDPI journal article supplement (doi:10.3390/cells11142233), 2022-07-18
Supplement: s1 [file s1]

**Supplementary Table S1 Monoclonal antibodies for characterization of phenotype and function of kidney T cells**

| Marker       | Fluorochrome  | Company         | Clone      |
|--------------|---------------|-----------------|------------|
| FVS780       |               | BD              | none       |
| CD45         | APC           | BD Pharmingen   | HI30       |
| CD3          | BV510         | Biolegend       | UCHT1      |
| CD4          | PE            | Biolegend       | RPA-T4     |
| CD8          | PerCP-Cy5.5   | Biolegend       | RPA-T8     |
| CD56         | PE-Cy7        | BD Pharmingen   | B159       |
| CD69         | FITC          | Biolegend       | FN50       |
| CD103        | BV421         | Biolegend       | Ber-ACT8   |
| CD3          | AF700         | Biolegend       | HIT3a      |
| CD4          | PerCP-Cy5.5   | BD Pharmingen   | RPA-T4     |
| CD8          | BV510         | Biolegend       | RPA-T8     |
| CD103        | BV711         | Biolegend       | Ber-ACT8   |
| CD69         | PE            | Biolegend       | FN50       |
| CD45RA       | BV650         | Biolegend       | HI100      |
| CCR7         | BV421         | Biolegend       | G043H7     |
| CD28         | BV785         | Biolegend       | CD28.2     |
| CD27         | BV605         | BD Horizon      | L128       |
| CD56         | BV570         | Biolegend       | HCD56      |
| CD161        | PE-Dazzle594  | Biolegend       | HP-3G10    |
| FOXP3        | AF488         | Biolegend       | 259D       |
| ROR $\gamma$ | APC           | Invitrogen      | B2D        |
| T-bet        | PE-Cy7        | Biolegend       | 4B10       |
| CD69         | BV421         | BD Horizon      | FN50       |
| CD103        | APC           | Biolegend       | Ber-ACT8   |
| TCR tubes    |               | Beckman Coulter | Clone      |
| A            | V $\beta$ 5.3 | PE              | 3D11       |
|              | V $\beta$ 3   | FITC            | CH92       |
|              | V $\beta$ 7.1 | PE + FITC       | ZOE        |
| B            | V $\beta$ 9   | PE              | FIN9       |
|              | V $\beta$ 16  | FITC            | TAMAYA 1.2 |
|              | V $\beta$ 17  | PE + FITC       | E17.5F3    |
| C            | V $\beta$ 18  | PE              | BA62.6     |
|              | V $\beta$ 20  | FITC            | ELL1.4     |
|              | V $\beta$ 5.1 | PE + FITC       | IMMU157    |

**Supplementary Table S1 Monoclonal antibodies for characterization of phenotype and function of kidney T cells**

|        |         |           |               |           |
|--------|---------|-----------|---------------|-----------|
| D      | Vβ 13.1 | PE        | IMMU222       |           |
|        | Vβ 8    | FITC      | 56C5.2        |           |
|        | Vβ 13.6 | PE + FITC | JU74.3        |           |
| E      | Vβ 5.2  | PE        | 36213         |           |
|        | Vβ 12   | FITC      | VER2.32       |           |
|        | Vβ 2    | PE + FITC | MPB2D5        |           |
| F      | Vβ 23   | PE        | AF23          |           |
|        | Vβ 21.3 | FITC      | IG125         |           |
|        | Vβ 1    | PE + FITC | BL37.2        |           |
| G      | Vβ 11   | PE        | C21           |           |
|        | Vβ 14   | FITC      | CAS1.1.3      |           |
|        | Vβ 22   | PE + FITC | IMMU546       |           |
| H      | Vβ 13.2 | PE        | H132          |           |
|        | Vβ 7.2  | FITC      | ZIZOU4        |           |
|        | Vβ 4    | PE + FITC | WJF24         |           |
| CD107a |         | FITC      | Biolegend     | H4A3      |
| IL-2   |         | BV421     | BD Horizon    | MQ1-17H12 |
| IL-17a |         | BV785     | Biolegend     | BL168     |
| IL-6   |         | PE-Cy7    | Biolegend     | MQ2-13A5  |
| IL-21  |         | AF647     | Biolegend     | 3A3-N2    |
| IFNγ   |         | BV650     | Biolegend     | 4S.B3     |
| TNFα   |         | BV605     | Biolegend     | Mab11     |
| CD14   |         | APC-Cy7   | BD Pharmingen | MΦP9      |
| CD19   |         | APC-Cy7   | BD Pharmingen | SJ25C1    |
| CD56   |         | APC-Cy7   | BD Pharmingen | HCD56     |
| CD137  |         | APC       | BD            | 4B4-1     |

## **Supplementary Table S1 Monoclonal antibodies for characterization of phenotype and function of kidney T cells**

### **Abbreviations:**

|                |                                       |
|----------------|---------------------------------------|
| APC            | AlloPhycoCyanin                       |
| BV             | Brilliant Violet                      |
| PE             | Phyco-erythrin                        |
| PerCP (-Cy5.5) | Peridinin-Chlorophyll Protein complex |
| FITC           | Fluorescein IsoThioCyanate            |
| FVS780         | Fixeable Viability Stain-780          |
| AF             | Alexa-Fluor                           |

**Supplementary Table S2 Lymphocyte composition following direct enzymatic processing of kidney tissue obtained from nephrectomy versus transplantectomy**

|                                                                              | Lymphocyte population |                     | $p^*$ | Resident (CD69 <sup>+</sup> CD103 <sup>+/+</sup> ) (%) |                     | $p^*$ |
|------------------------------------------------------------------------------|-----------------------|---------------------|-------|--------------------------------------------------------|---------------------|-------|
|                                                                              | nephrectomy           | transplantectomy    |       | nephrectomy                                            | transplantectomy    |       |
| T cells (cells/mm <sup>3</sup> )                                             | 186 (37-342)          | 1269 (379-2258)     | 0.02  | 82.94 (67.60-88.94)                                    | 93.43 (78.69-98.37) | 0.20  |
| CD4 <sup>+</sup> T cells<br>(% of CD3 <sup>+</sup> T cells)                  | 56.06 (45.81-69.71)   | 28.96 (17.58-49.52) | 0.11  | 86.04 (76.64-91.10)                                    | 93.75 (74.47-97.54) | 0.49  |
| CD8 <sup>+</sup> T cells<br>(% of CD3 <sup>+</sup> T cells)                  | 35.97 (23.08-47.91)   | 63.61 (39.44-77.50) | 0.11  | 84.46 (62.31-88.52)                                    | 94.17 (85.59-99.12) | 0.11  |
| CD4 <sup>+</sup> CD8 <sup>+</sup> T cells<br>(% of CD3 <sup>+</sup> T cells) | 5.00 (3.21-5.73)      | 5.56 (2.78-10.78)   | 0.89  | 74.35 (55.56-79.16)                                    | 89.38 (83.99-94.76) | 0.03  |
| CD161 <sup>+</sup> T cells<br>(% of CD3 <sup>+</sup> T cells)                | 14.75 (10.80-17.25)   | 13.65 (6.80-17.69)  | 0.89  | 94.88 (87.43-95.19)                                    | 98.58 (92.62-99.08) | 0.20  |
| NK cells (CD56 <sup>+</sup> CD3 <sup>-</sup> )<br>(cells/mm <sup>3</sup> )   | 11 (6-75)             | 52 (10-106)         | 0.29  | 67.01 (59.33-75.10)                                    | 87.97 (79.11-94.05) | 0.03  |

Median and IQ range depicted

\* The different populations for kidney tissue obtained from nephrectomy ( $n=4$ ) and transplantectomy ( $n=4$ ) were compared using Mann-Whitney tests,  $p<0.05$  was considered significantly different.

**Supplementary Table S3 CD4<sup>+</sup> and CD8<sup>+</sup> T cell phenotype characteristics following direct enzymatic processing of kidney tissue obtained from a nephrectomy and transplantectomy**

|                          | Resident (CD69 <sup>+</sup> CD103 <sup>±</sup> ) (%) |                     | <i>p</i> ** |
|--------------------------|------------------------------------------------------|---------------------|-------------|
|                          | nephrectomy                                          | transplantectomy    |             |
| CD4 <sup>+</sup> T cells |                                                      |                     |             |
| Naïve (CD45RA+CCR7+)*    | 1.54 (0.22-2.90)                                     | 1.94 (0.23-4.46)    | 0.69        |
| CM (CD45RA-CCR7+)*       | 8.33 (6.70-20.18)                                    | 24.73 (5.42-46.44)  | 0.69        |
| EM (CD45RA-CCR7-)*       | 89.46 (73.18-90.07)                                  | 70.63 (47.33-92.21) | 0.69        |
| EMRA (CD45RA+CCR7-)*     | 1.81 (1.06-4.54)                                     | 1.99 (1.25-3.38)    | 1.00        |
| CD27+CD28+*              | 26.05 (8.64-32.59)                                   | 31.46 (11.42-45.64) | 0.49        |
| CD27-CD28+*              | 61.41 (52.36-85.49)                                  | 55.89 (42.09-80.44) | 0.49        |
| CD27+CD28-*              | 0.43 (0.09-0.87)                                     | 1.20 (0.33-3.55)    | 0.34        |
| CD27-CD28-*              | 9.28 (1.92-20.89)                                    | 7.42 (6.30-14.27)   | 0.89        |
| Tregs (CD45RA+/-FOXP3+)* | 1.38 (0.76-3.11)                                     | 2.31 (1.31-2.42)    | 0.49        |
| Tbet+*                   | 65.48 (52.94-87.55)                                  | 76.47 (68.21-88.21) | 0.69        |
| RORγ+*                   | 2.01 (1.84-4.71)                                     | 2.92 (1.99-3.72)    | 0.54        |
| FOXP3+*                  | 4.68 (2.54-6.97)                                     | 5.34 (3.87-9.80)    | 0.69        |
| CD8 <sup>+</sup> T cells |                                                      |                     |             |
| Naive (CD45RA+CCR7+)*    | 1.51 (0.81-2.11)                                     | 2.65 (0.42-6.28)    | 0.69        |
| CM (CD45RA-CCR7+)*       | 4.26 (3.56-6.34)                                     | 5.27 (1.54-9.03)    | 0.89        |
| EM(CD45RA-CCR7-)*        | 68.94 (48.13-83.17)                                  | 80.13 (69.31-92.56) | 0.49        |
| EMRA (CD45RA+CCR7-)*     | 26.41 (8.74-46.04)                                   | 11.95 (5.07-15.81)  | 0.34        |
| CD27+CD28+*              | 8.97 (0.92-18.12)                                    | 36.44 (22.09-53.95) | 0.03        |
| CD27-CD28+*              | 31.73 (6.27-50.84)                                   | 13.70 (5.92-19.38)  | 0.69        |
| CD27+CD28-*              | 10.94 (0.41-42.82)                                   | 29.10 (17.75-43.67) | 0.49        |
| CD27-CD28-*              | 47.97 (32.59-48.42)                                  | 17.40 (8.90-31.71)  | 0.06        |
| Tbet+*                   | 78.01 (72.68-91.34)                                  | 88.72 (81.39-91.85) | 0.49        |
| RORγ+*                   | 2.79 (1.12-4.44)                                     | 1.13 (0.58-1.73)    | 0.34        |

|         |                  |                  |      |
|---------|------------------|------------------|------|
| FOXP3+* | 1.30 (0.88-1.56) | 0.43 (0.18-1.15) | 0.11 |
|---------|------------------|------------------|------|

Median and IQ range depicted

\* proportions within CD69+CD103+/- (resident) T cells are given

\*\* subset composition was compared for kidney tissue obtained from a nephrectomy (N=4) versus that of a transplantectomy (N=4) using Mann Whitney tests,  $p < 0.05$  was considered statistically significant

**Supplementary Table S4 Proportions of cytokine producing and CD107a-expressing T cells following direct enzymatic processing of renal tissue obtained from a nephrectomy and transplantectomy**

|                      | CD103+               |                           | $p^{***}$ | CD103-               |                           | $p^{**}$ |
|----------------------|----------------------|---------------------------|-----------|----------------------|---------------------------|----------|
|                      | Nephrectomy<br>(n=6) | Transplantectomy<br>(n=4) |           | Nephrectomy<br>(n=6) | Transplantectomy<br>(n=4) |          |
| CD4+T cells          |                      |                           |           |                      |                           |          |
| CD107a*              | 15.79 (7.30-23.50)   | 34.99 (15.75-50.85)       | 0.07      | 14.29 (10.94-26.06)  | 27.42 (19.7-30.50)        | 0.07     |
| TNF- $\alpha$ *      | 90.90 (85.63-95.94)  | 66.37 (54.63-89.52)       | 0.17      | 76.71 (67.61-79.51)  | 53.96 (36.11-60.52)       | 0.02     |
| IL-2*                | 69.44 (31.51-83.15)  | 34.86 (14.73-74.41)       | 0.35      | 61.06 (19.65-67.07)  | 27.41 (11.00-49.19)       | 0.11     |
| IFN- $\gamma$ *      | 75.78 (74.24-81.00)  | 64.80 (32.45-82.67)       | 0.17      | 59.00 (44.00-62.20)  | 28.99 (15.30-37.41)       | 0.07     |
| IL-6*                | 2.62 (1.64-3.82)     | 1.46 (0.80-3.03)          | 0.35      | 2.13 (1.44-2.55)     | 0.35 (0.30-1.18)          | 0.02     |
| IL-17A*              | 4.34 (3.44-5.99)     | 6.83 (2.60-17.25)         | 0.48      | 2.33 (1.16-4.02)     | 1.86 (1.53-2.21)          | 0.76     |
| IL-21*               | 10.53 (8.72-14.51)   | 15.91 (11.22-33.20)       | 0.26      | 4.61 (2.69-9.83)     | 9.76 (6.31-16.86)         | 0.11     |
| Polyfunctional<br>*# | 82.33 (75.58-89.79)  | 60.73 (34.11-85.77)       | 0.17      | 69.59 (62.14-73.93)  | 45.96 (23.77-54.49)       | 0.04     |
| CD8+T cells          |                      |                           |           |                      |                           |          |
| CD107a*              | 32.75 (17.74-37.77)  | 71.98 (56.09-89.67)       | <0.01     | 36.31 (22.43-38.82)  | 60.82 (44.09-65.88)       | 0.02     |
| TNF- $\alpha$ *      | 83.88 (73.74-91.51)  | 21.74 (12.99-51.40)       | <0.01     | 80.79 (74.51-87.44)  | 41.05 (25.13-63.11)       | <0.01    |
| IL-2*                | 30.10 (14.59-50.89)  | 3.28 (1.27-31.99)         | 0.11      | 29.50 (7.59-44.07)   | 6.44 (1.73-27.86)         | 0.26     |
| IFN- $\gamma$ *      | 79.05 (62.82-93.44)  | 56.53 (14.34-79.44)       | 0.26      | 70.68 (40.73-82.66)  | 48.95 (21.87-64.75)       | 0.26     |
| IL-6*                | 3.16 (1.53-4.19)     | 0.65 (0.23-1.38)          | 0.02      | 1.71 (0.52-2.30)     | 0.29 (0.17-0.69)          | 0.04     |
| IL-17A*              | 3.29 (2.06-6.47)     | 0.84 (0.38-3.21)          | 0.11      | 1.14 (0.30-1.57)     | 0.17 (0.05-0.29)          | 0.03     |
| IL-21*               | 2.64 (1.58-4.86)     | 2.08 (0.91-6.89)          | 0.61      | 1.75 (0.97-2.55)     | 1.83 (1.03-3.08)          | 0.97     |
| Polyfunctional<br>*# | 77.77 (65.15-87.94)  | 53.52 (17.46-68.29)       | 0.04      | 79.69 (54.66-84.39)  | 56.84 (25.42-68.55)       | 0.17     |

Median and IQ range depicted

\* proportions within CD103+/- T cells, respectively

# polyfunctional defined as  $\geq 2$  pro-inflammatory and/or degranulation factors (TNF- $\alpha$ , IL-2, IFN- $\gamma$  and/or CD107a)/ cell

\*\*\*\* The different populations for kidney tissue obtained from nephrectomy and transplantectomy were compared using Mann-Whitney tests,  $p < 0.05$  was considered significantly different.

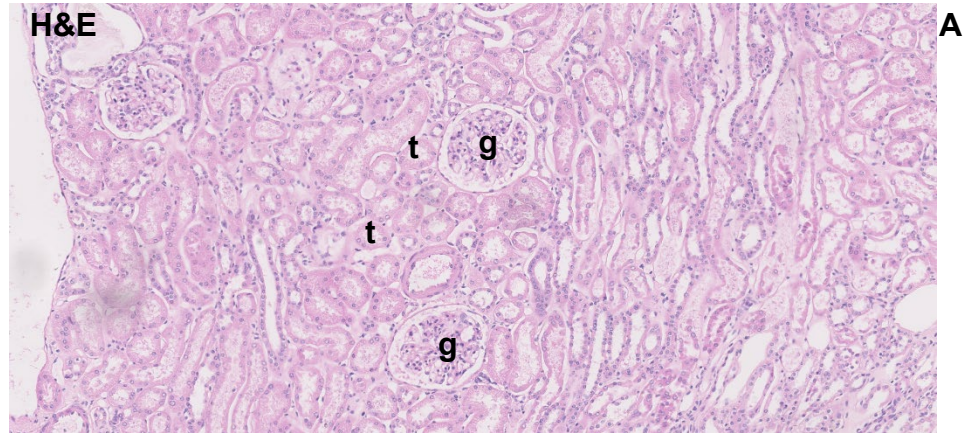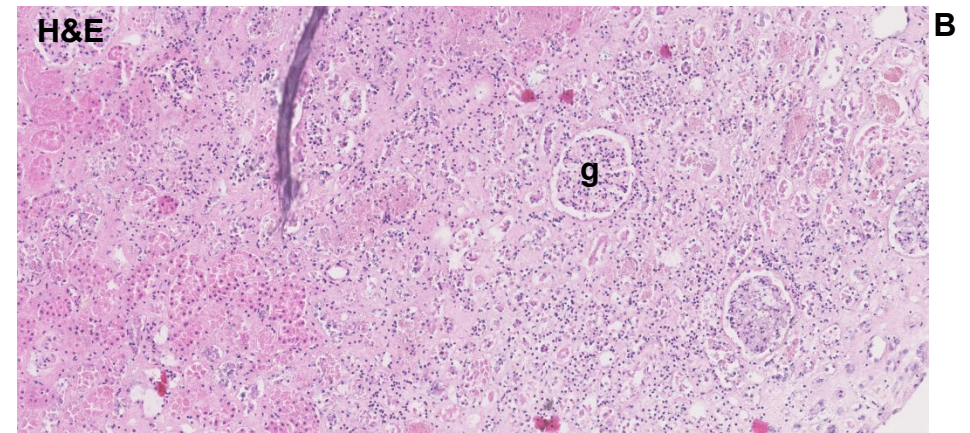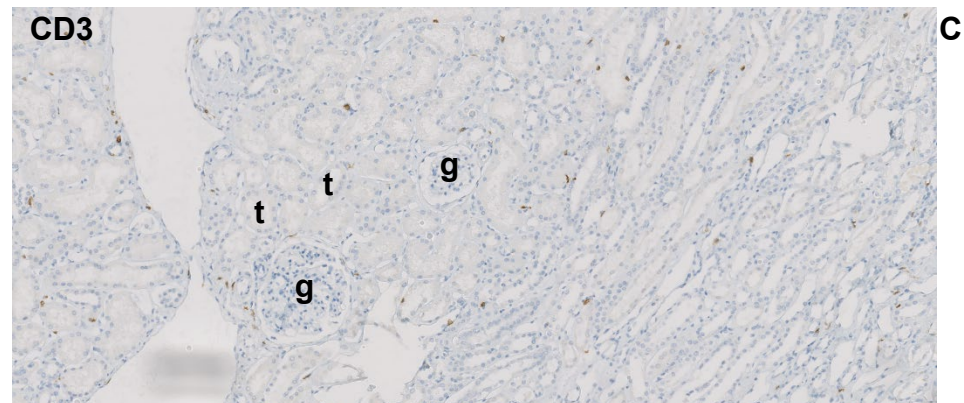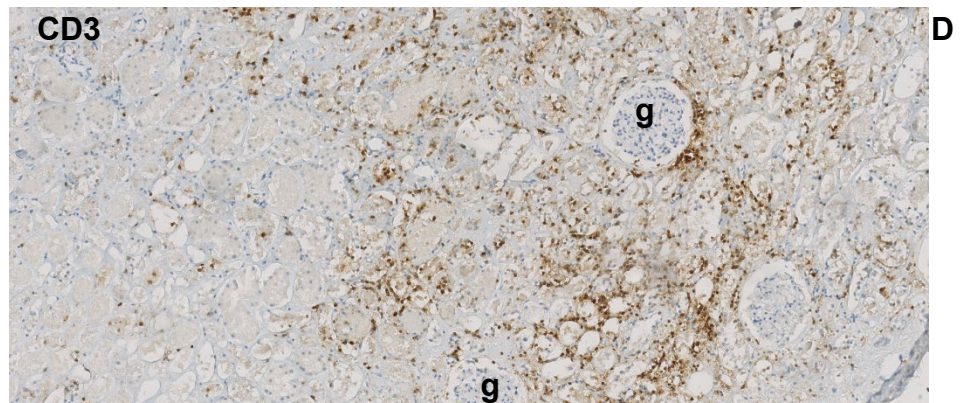

### Supplementary Figure S1 Immunohistochemistry of kidney tissue

Healthy kidney tissue obtained via a nephrectomy was stained for hematoxylin and eosin (H&E; 10x magnification; A and B) and CD3 (10x magnification; C and D) before (A and C) and following four weeks of kidney tissue culture in presence of exogenous IL-2/IL-15 (B and D). A representative example is shown for in total 6 kidney tissues, 3 kidney tissues were obtained following a nephrectomy and 3 following a transplantectomy. Before culture, glomeruli (g) as well as tubuli (t) are observed and, the glomeruli, but not tubuli, stay intact following a four week explant culture. Interestingly, whereas hardly any T cells are present before culture (C, brown dots), numerous CD3+ T cells are present in the interstitium upon four weeks of culture in presence of exogenous IL-2/IL-15.
